# Supplementary material for: Symmetrical and unsymmetrical multibranched D–π–A molecules based on 1,3,5-triazine unit: synthesis and photophysical properties
Source: Royal Society of Chemistry journal article supplement (doi:10.1039/c2jm32323k), 2012-01-01
Supplement: c2jm32323k.pdf [file c2jm32323k.pdf]

## Electronic Supplementary Information

# Symmetrical and Unsymmetrical Mutibranched D- $\pi$ -A Molecules Based on 1,3,5-triazine Unit: Synthesis and Photophysical Properties

Liqian Zhang,<sup>a</sup> Li Zou,<sup>a</sup> Jiang Xiao,<sup>a</sup> Pengcheng Zhou,<sup>a</sup> Cheng Zhong,<sup>a</sup> Xingguo Chen,<sup>a\*</sup> Jingui Qin,<sup>a</sup> Inês F. A. Mariz,<sup>b</sup> Ermelinda Maçôas<sup>b\*</sup>

<sup>a</sup> College of Chemistry and Molecular Sciences, and Hubei Key Laboratory on Organic and Polymeric Opto-electronic Materials, Wuhan University, Wuhan 430072, China. Fax: 86-27-68756757; Tel: 86-27-68755655; E-mail: [xgchen@whu.edu.cn](mailto:xgchen@whu.edu.cn)

<sup>b</sup> Centro de Química-Física Molecular, and Institute of Nanoscience and Nanotechnology (N), Complexo I, Instituto Superior Técnico, Av. Rovisco Pais, 1049-001, Lisboa, Portugal. Fax: 351-218 -464455; Tel: +351- 218- 419218; E-mail: [ermelinda.macoas@ist.utl.pt](mailto:ermelinda.macoas@ist.utl.pt)

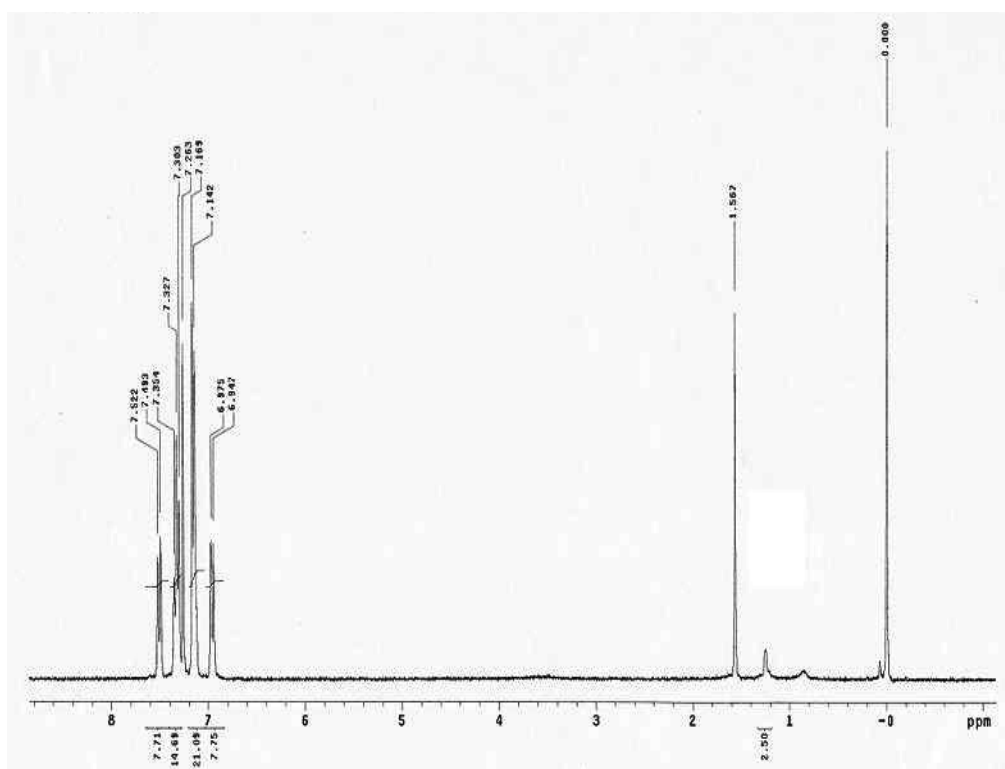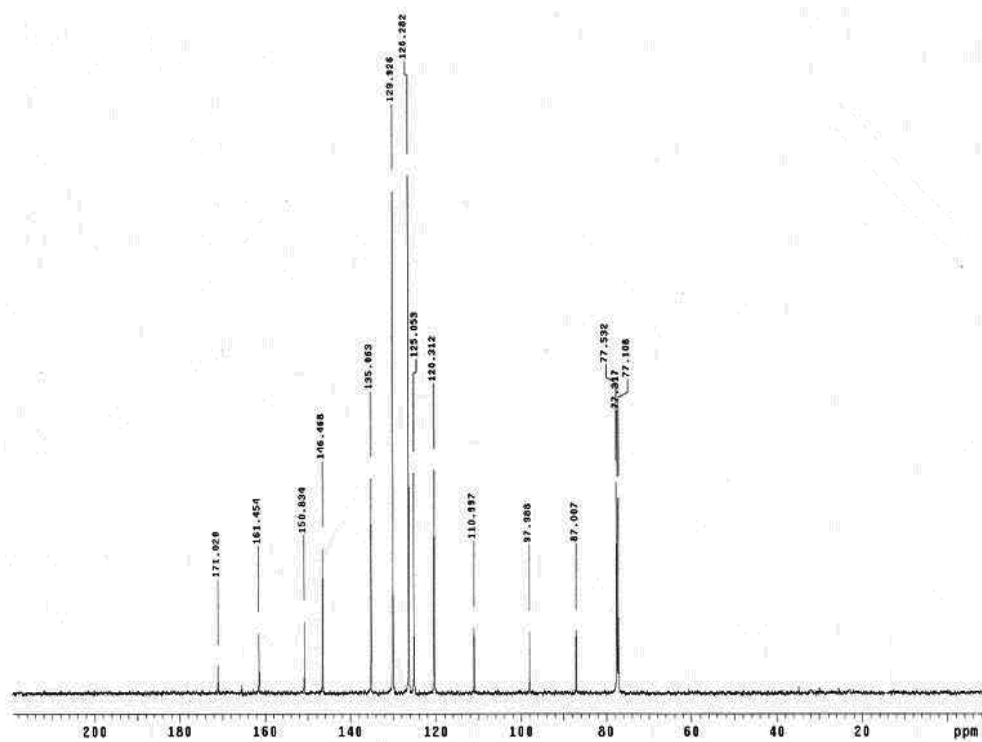

$^1\text{H-NMR}$  and  $^{13}\text{C-NMR}$  spectra of 4a

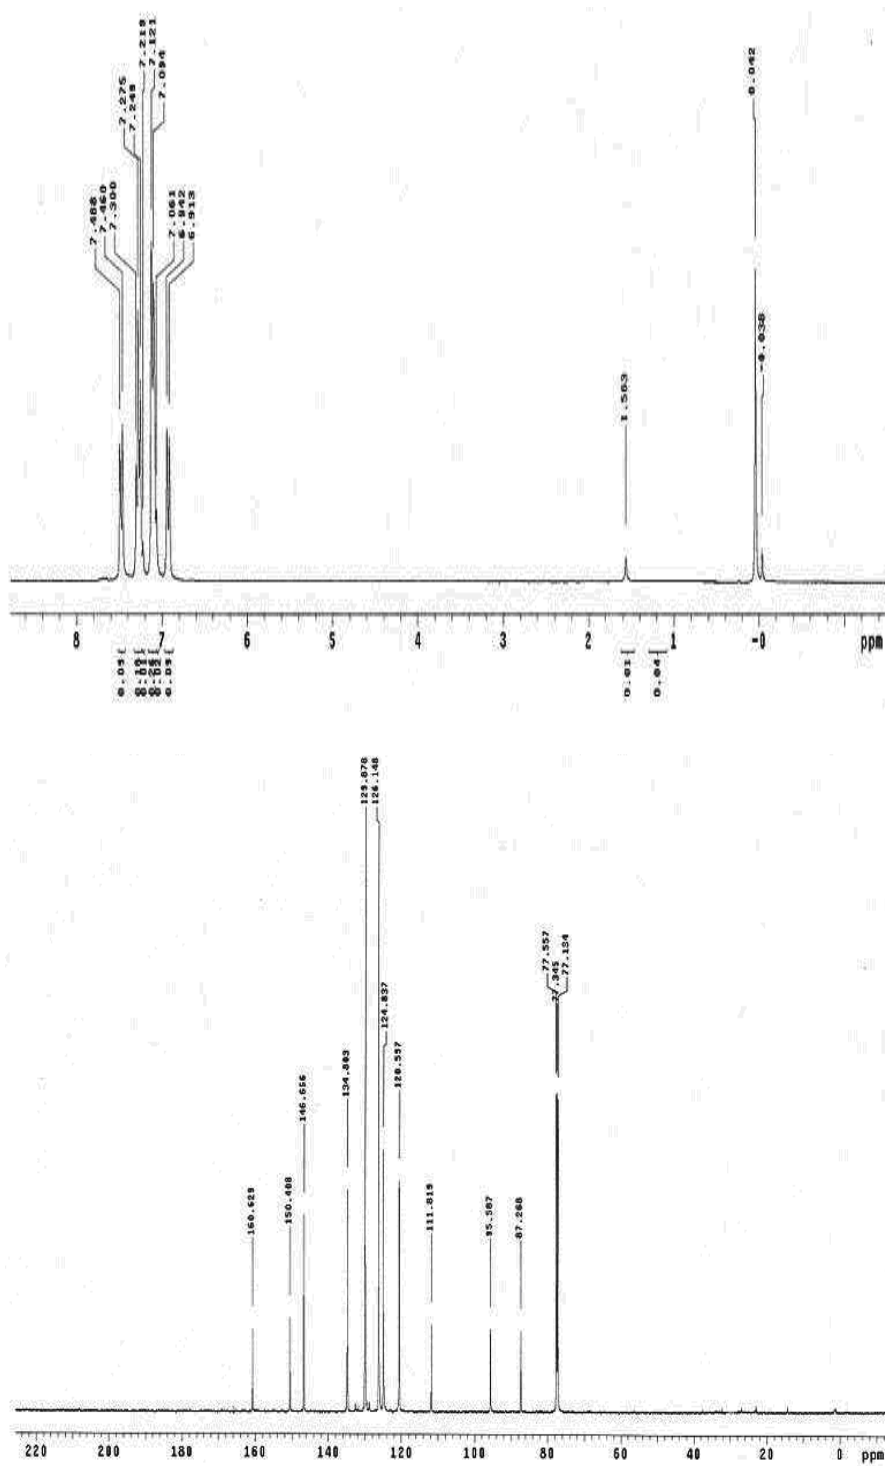

$^1\text{H-NMR}$  and  $^{13}\text{C-NMR}$  spectra of 5a

ZhangL03-18-2-C

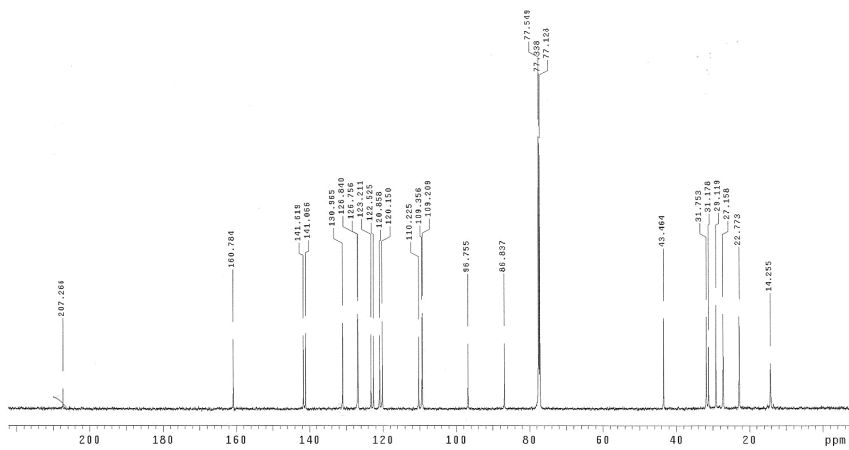

z1q110917-2

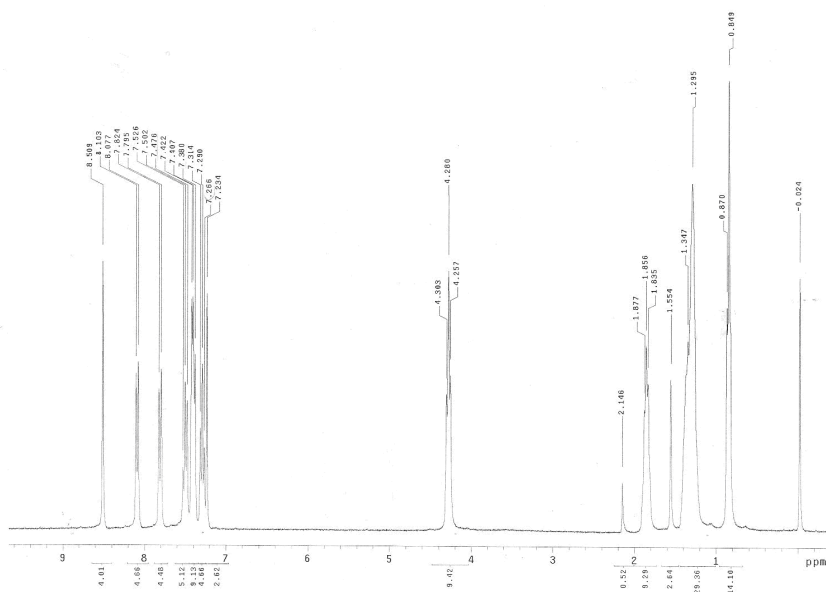

<sup>1</sup>H-NMR and <sup>13</sup>C-NMR spectra of 5b

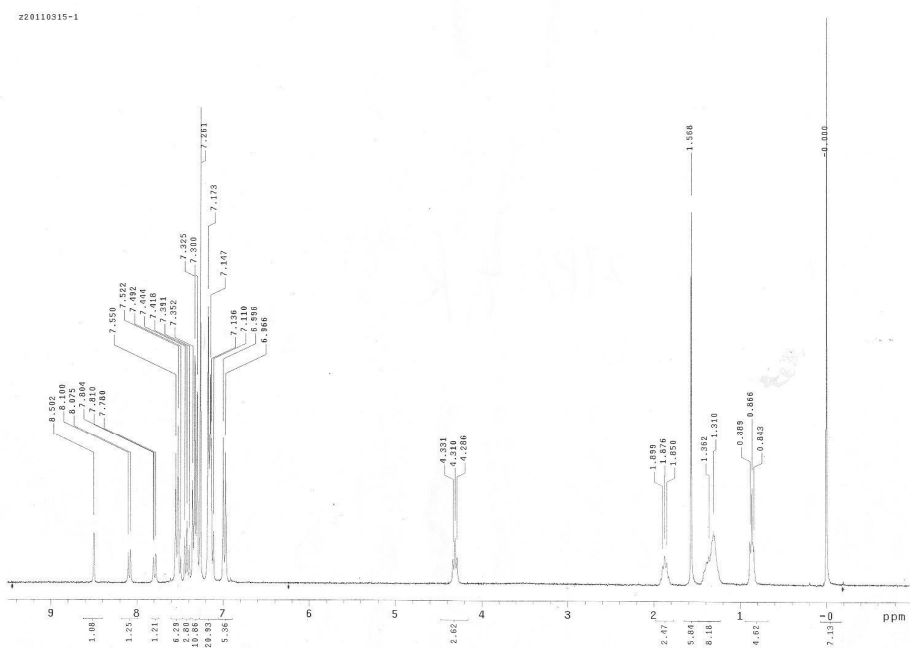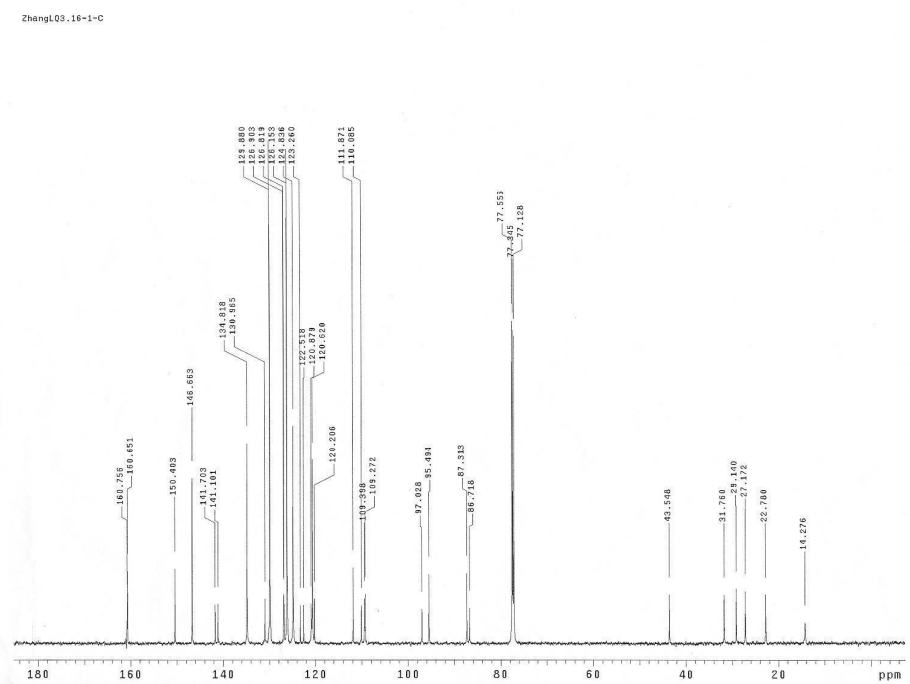

$^1\text{H-NMR}$  and  $^{13}\text{C-NMR}$  spectra of 6a

Z1q101131-2

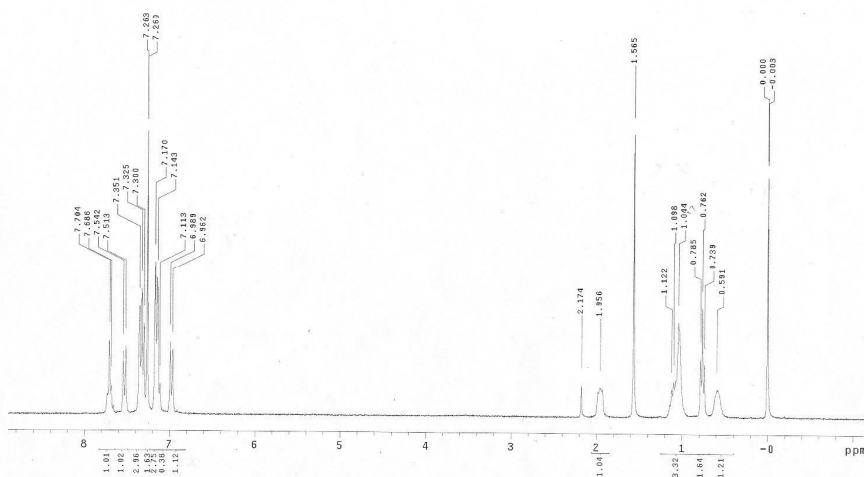

Z1Q4.1-C

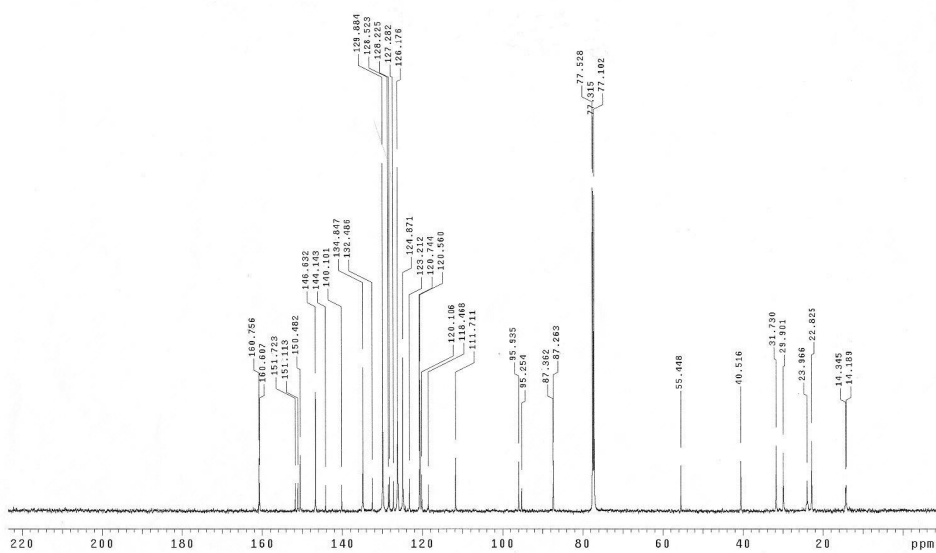

<sup>1</sup>H-NMR and <sup>13</sup>C-NMR spectra of 6b

z20110815-2

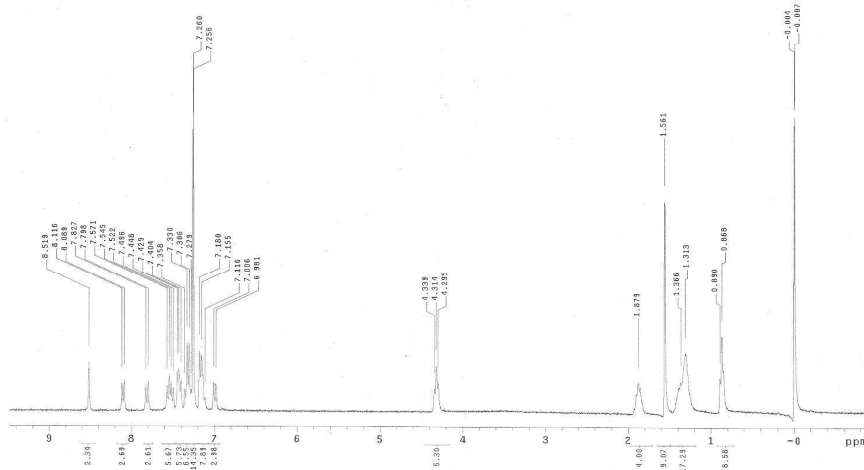

ZhangLQ3-16-2-C

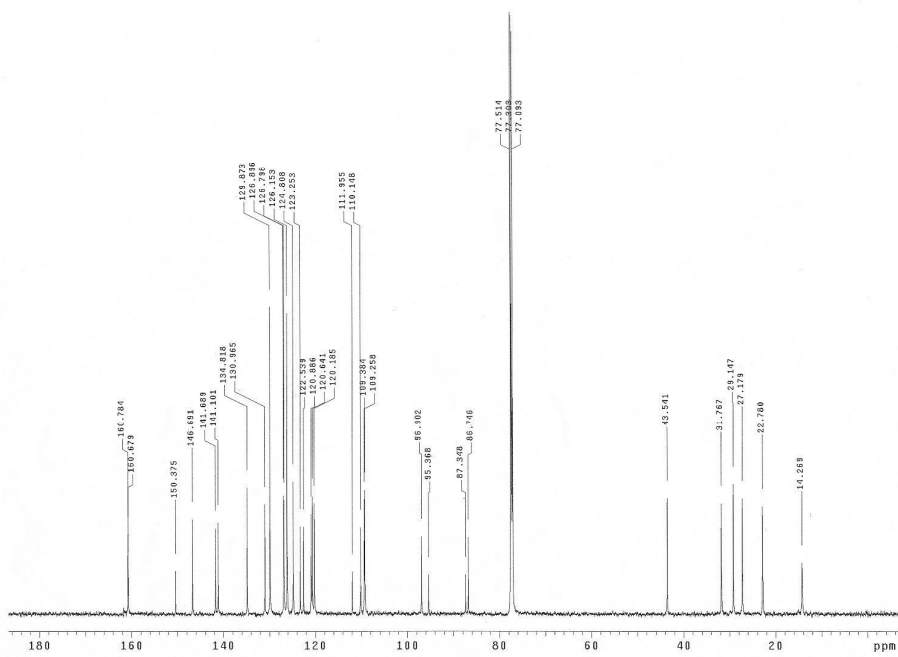

$^1\text{H-NMR}$  and  $^{13}\text{C-NMR}$  spectra of 6c

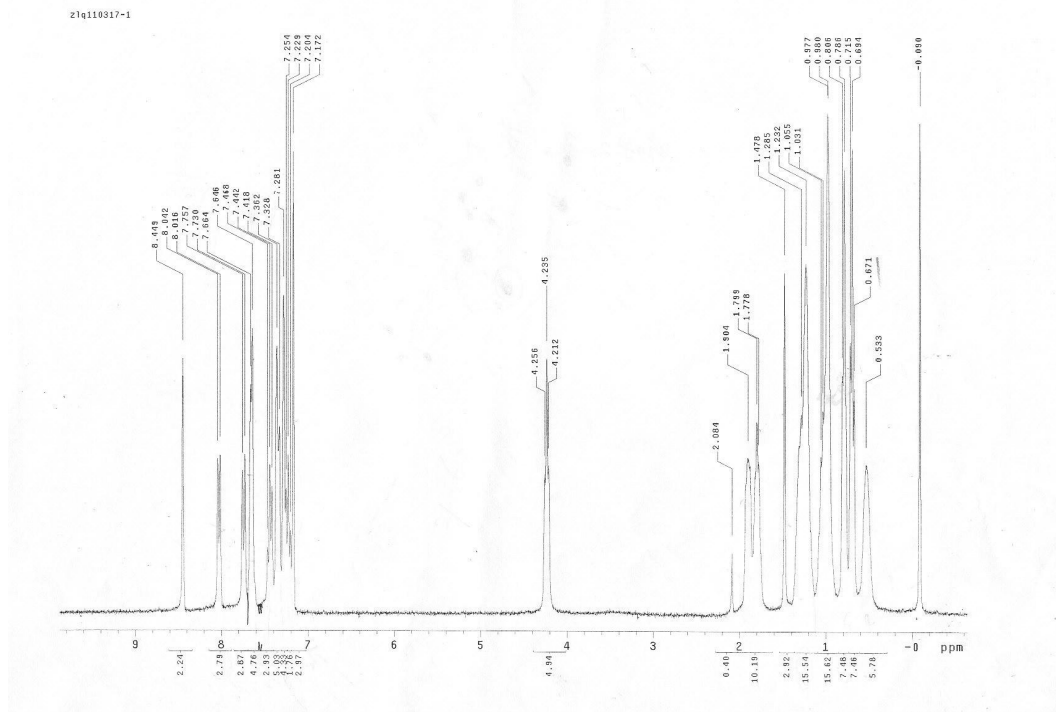

Zhang1.03.16-1-C

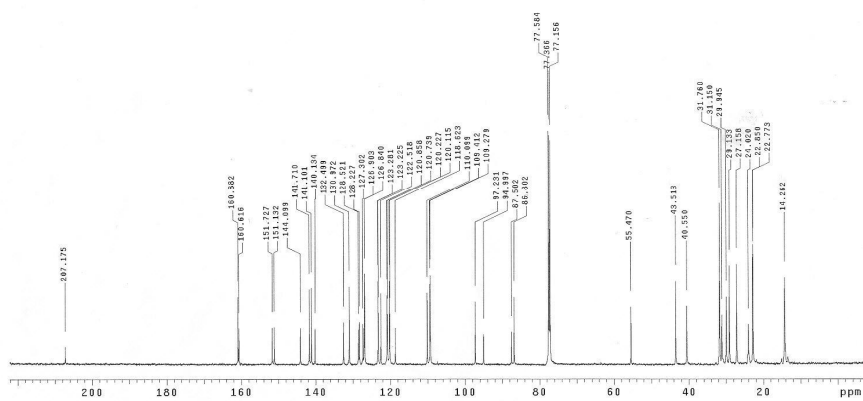

$^1\text{H-NMR}$  and  $^{13}\text{C-NMR}$  spectra of 6d



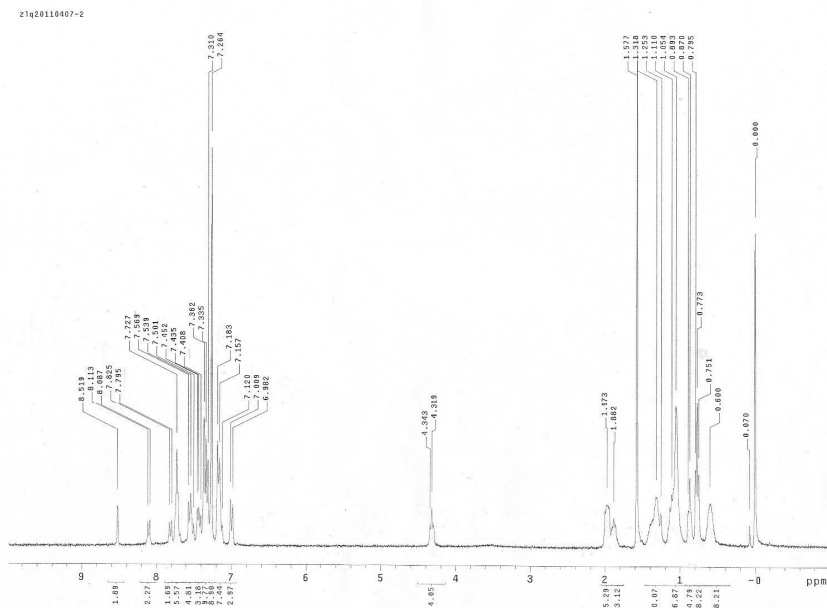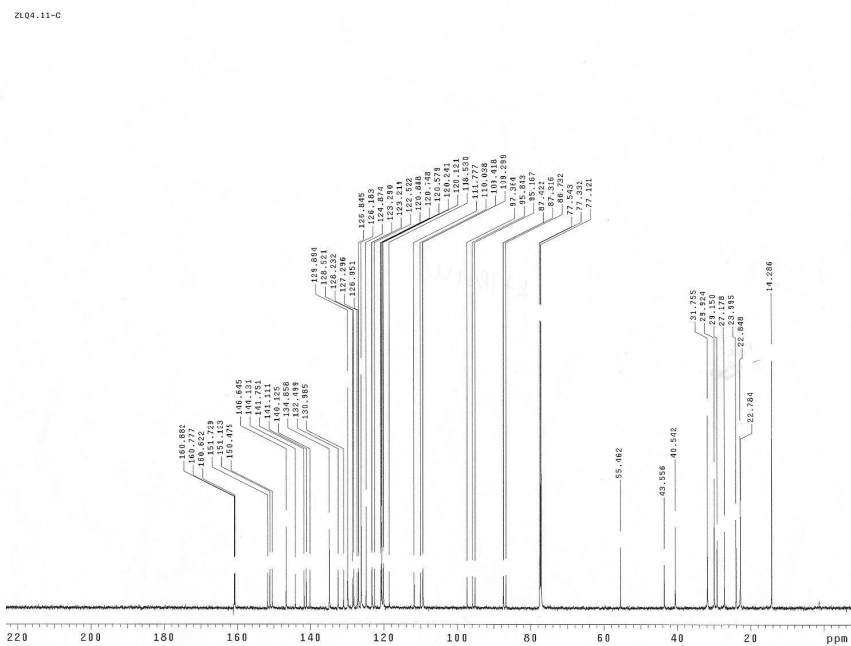

$^1\text{H-NMR}$  and  $^{13}\text{C-NMR}$  spectra of **8a**
